# Supplementary material
Source: PubMed Central journal article supplement (PMC3174062)

Wild Type

SIN3A

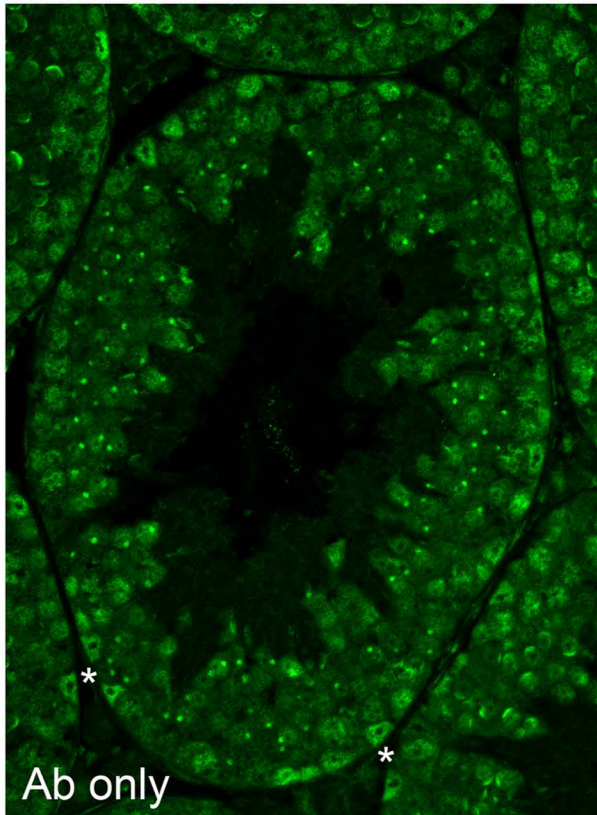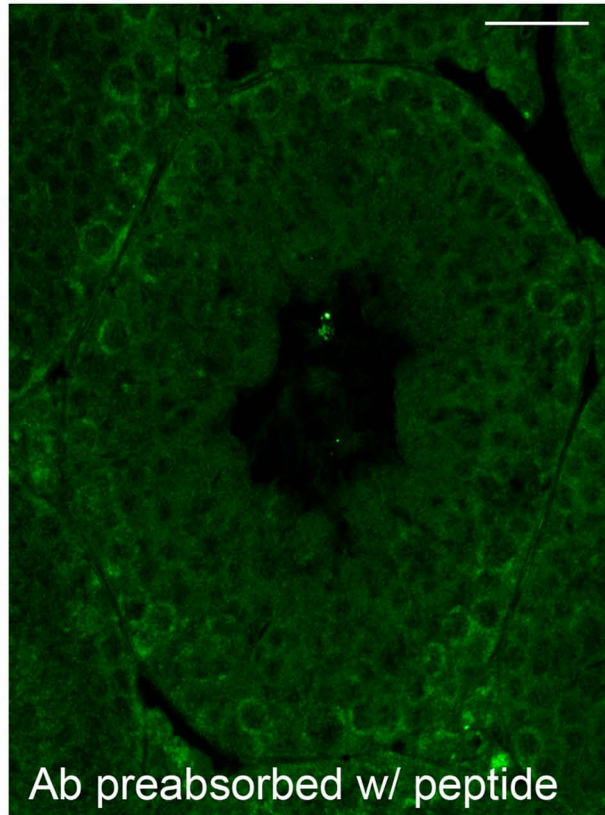

6-wk-old

Supplement: NIHMS322360-supplement-Supp_Fig_S1.pdf [file NIHMS322360-supplement-Supp_Fig_S1.pdf]

GCNA1

PLZF

Merge

Wild Type

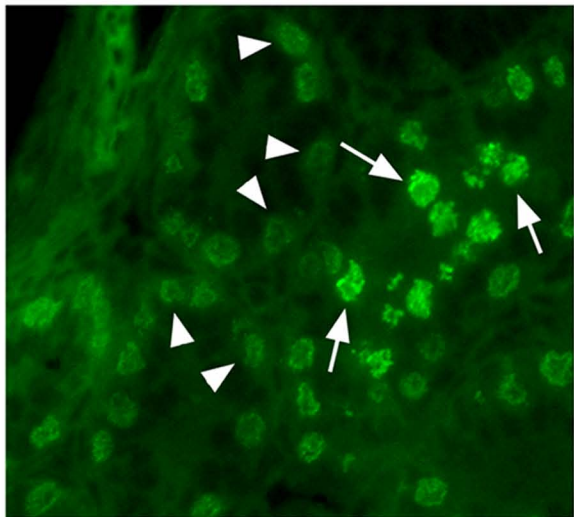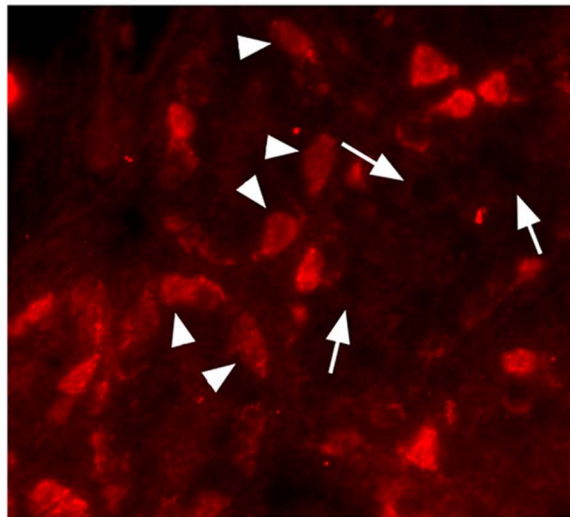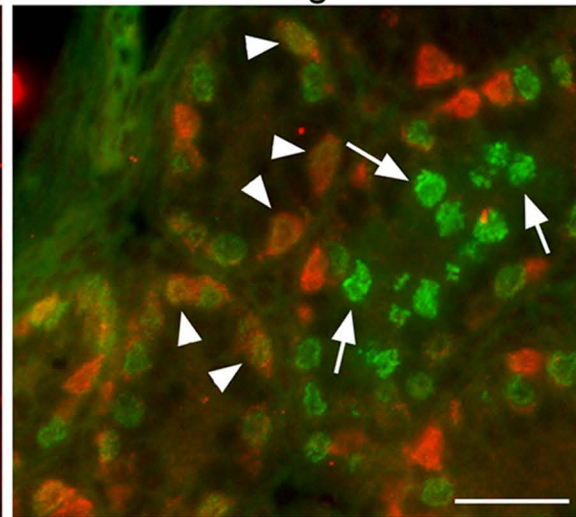

5-day-old

Supplementary Figure 2

Payne

Supplement: NIHMS322360-supplement-Supp_Fig_S2.pdf [file NIHMS322360-supplement-Supp_Fig_S2.pdf]

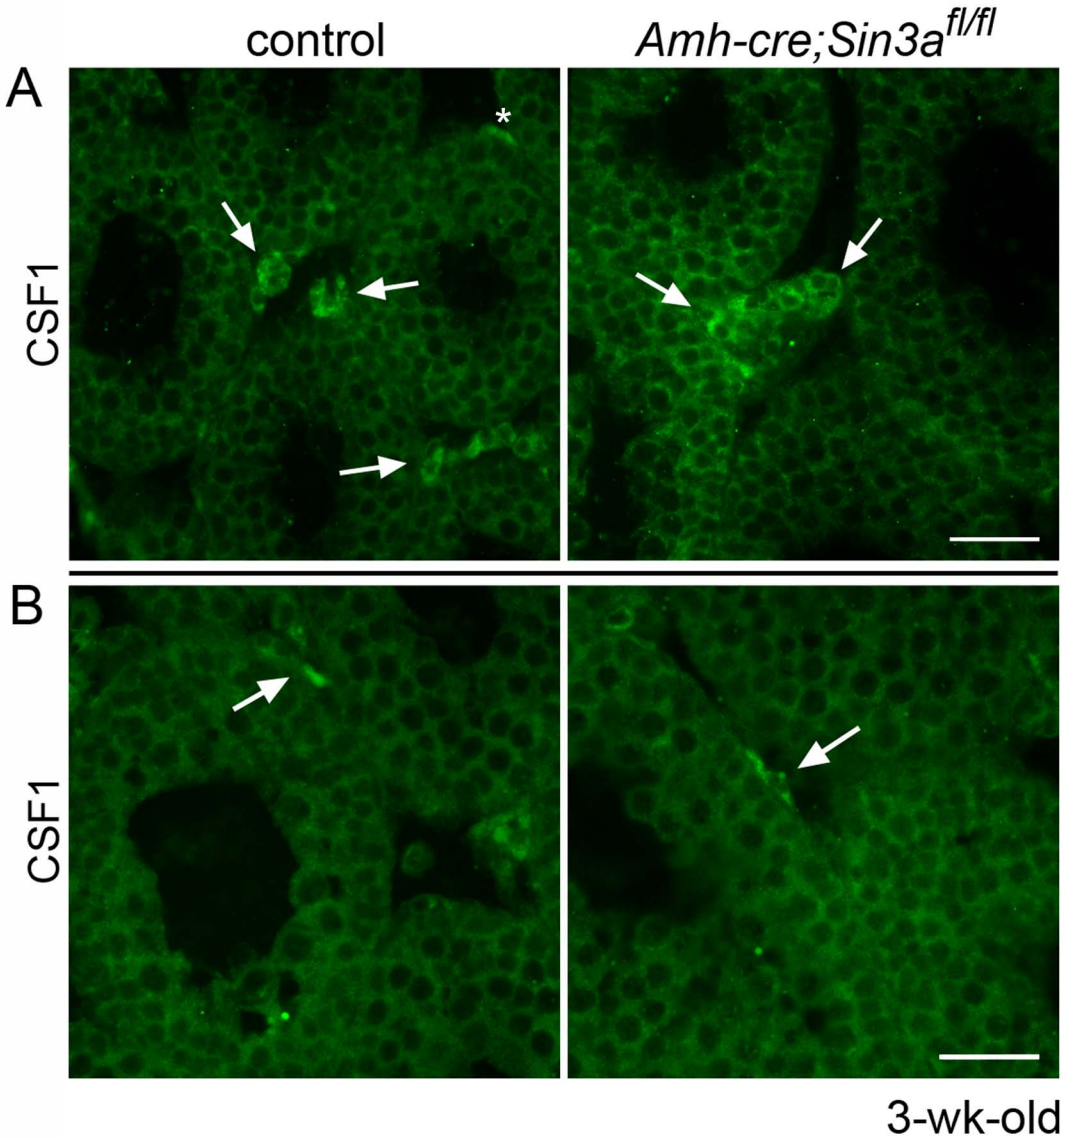

Supplement: NIHMS322360-supplement-Supp_Fig_S3.pdf [file NIHMS322360-supplement-Supp_Fig_S3.pdf]
